# Supplementary material for: Key Signature Genes of Early Terminal Granulocytic Differentiation Distinguish Sepsis From Systemic Inflammatory Response Syndrome on Intensive Care Unit Admission
Source: PubMed Central journal article supplement (PMC9280679; doi:10.3389/fimmu.2022.864835), 2022-06-30
Supplement: DataSheet_1.pdf [file DataSheet_1.pdf]

## Supplementary Material

### Table of Contents

|                        |    |
|------------------------|----|
| Supplementary Text 1   | 1  |
| Supplementary Figure 1 | 2  |
| Supplementary Figure 2 | 3  |
| Supplementary Figure 3 | 5  |
| Supplementary Figure 4 | 6  |
| Supplementary Table 1  | 7  |
| Supplementary Table 2  | 10 |
| Supplementary Table 3  | 11 |
| Supplementary Table 4  | 16 |

## SUPPLEMENTARY TEXT 1

### Demographic characteristics

Our recent 2016/2017-ground truth survey conducted in the interdisciplinary surgical intensive care unit (ICU) of the University Medical Center Mannheim, the site of this study, supports the overall representativeness of our ICU patient population for Western European ICUs with regard to demographic characteristics and clinical phenotypes (Lindner et al., 2022). According to municipal population statistics (<https://www.mannheim.de/de/stadt-gestalten/daten-und-fakten/bevoelkerung/einwohner-mit-migrationshintergrund>, accessed on March 31 2022), the current (as of December 31, 2021) proportion of the residents of Mannheim with migrant background is at 43.6%. At least 70% of this fraction are of European ancestry. We did not record patient's racial and ethnic categories systematically. Yet, we consider our study population to be more homogenous regarding race and ethnicity than seen in hospitals that service populations with more diverse decent.

### Clinical characteristics

We previously reported clinical characteristics for the discovery and validation cohorts on ICU admission (Coulibaly *et al.*, 2019). In the current study, we additionally considered available information on clinical characteristics in the medical records. The presence of infections was physician-adjudicated (T.S.). For interventions and blood marker test results, we considered the points in time nearest to the blood draws that were conducted during the routine morning laboratory orders around 7 AM. For interventions, we considered available entries recorded for the period from 7 AM on the day before the draw to 12 PM on the day of the draw. We considered entries for blood marker test results for patient samples collected between 7 AM on day 7 before the draw and 12 PM on the day of the draw.

For four of the patients with SIRS, who were enrolled during the extended recruitment period (2018–2020) of the validation cohort, and from whom samples were used in the flow cytometric analysis, blood samples were obtained in the post-anesthesia care unit, i.e., shortly prior to ICU admission. Clinical documentation for these was not available to derive the SOFA score and SAPS2 (<https://heidata.uni-heidelberg.de/dataset.xhtml?persistentId=doi:10.11588/data/EIXOPN>).

### References

Coulibaly A, Velasquez SY, Sticht C, Figueiredo AS, Himmelhan BS, Schulte J, *et al.* AKIRIN1: A Potential New Reference Gene in Human Natural Killer Cells and Granulocytes in Sepsis. *Int J Mol Sci* (2019) 20(9):2290. doi: 10.3390/ijms20092290

Lindner HA, Schamoni S, Kirschning T, Worm C, Hahn B, Centner FS, *et al.* Ground Truth Labels Challenge the Validity of Sepsis Consensus Definitions in Critical Illness. *J Transl Med* (2022) 15:20(1): 27

**SUPPLEMENTARY FIGURE 1**

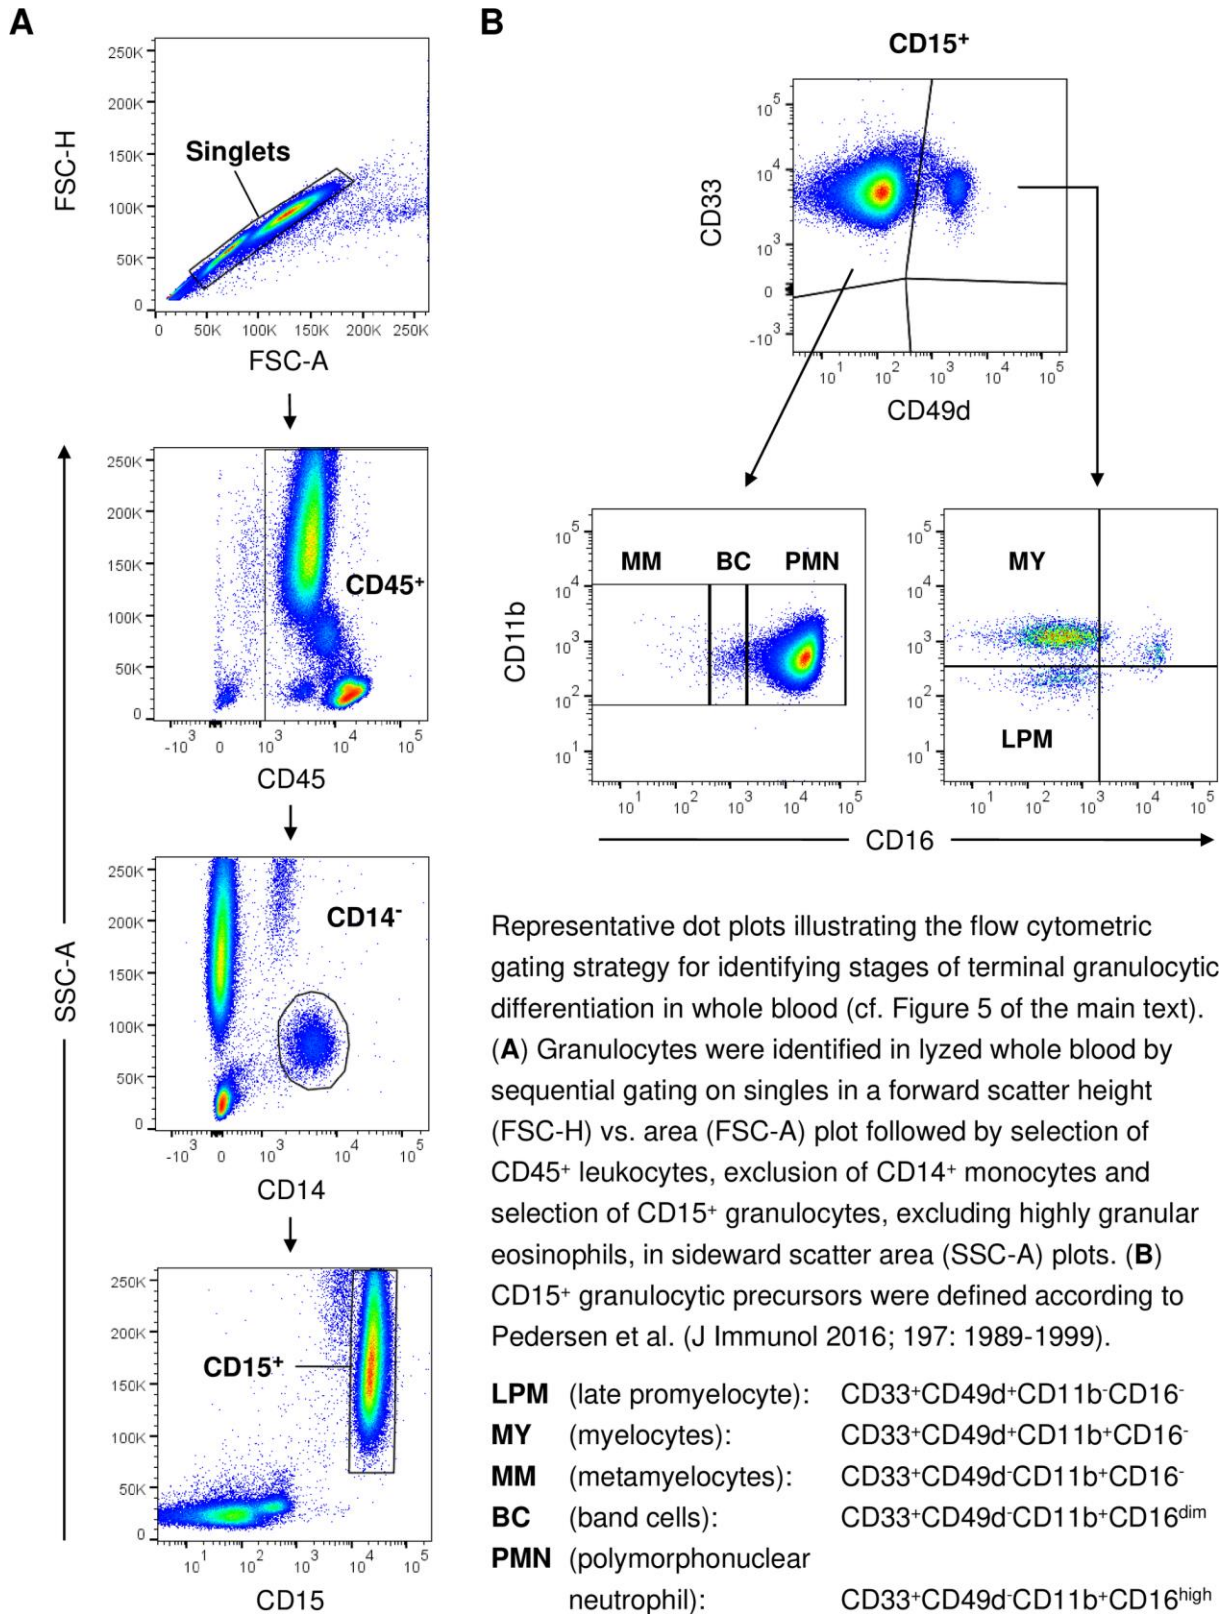

## SUPPLEMENTARY FIGURE 2

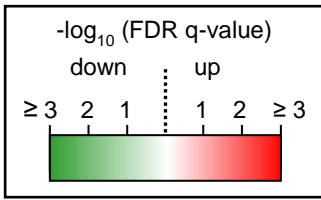

### Metabolism

|                                             | Sepsis vs SIRS | SIRS vs Pres. | Sepsis vs Pres. |
|---------------------------------------------|----------------|---------------|-----------------|
| Carbon Metabolism                           | 2              |               | 2               |
| Fatty Acid Metabolism                       | 10             |               | 7               |
| Glycolysis                                  |                | 3             | 5               |
| Citrate Cycle (TCA Cycle)                   | 9              |               |                 |
| Pentose Phosphate Pathway                   |                |               |                 |
| Fructose and Mannose Metabolism             |                |               |                 |
| Galactose Metabolism                        |                |               |                 |
| Starch and Sucrose Metabolism               |                | 1             | 4               |
| Pyruvate Metabolism                         |                |               |                 |
| Propanoate Metabolism                       |                |               | 9               |
| Oxidative Phosphorylation                   | 1              |               | 1               |
| Fatty Acid Degradation                      |                |               |                 |
| Steroid Biosynthesis                        |                |               |                 |
| Amino Sugar and Nucleotide Sugar Metabolism |                |               | 6               |
| Pyrimidine Metabolism                       |                |               |                 |
| Valine, Leucine, and Isoleucine Degradation |                |               |                 |
| Glutathione Metabolism                      |                |               |                 |
| N-Glycan Biosynthesis                       |                |               |                 |
| Glycosaminoglycan Degradation               |                |               |                 |
| Porphyrin and Chlorophyll Metabolism        |                |               |                 |
| Terpenoid Backbone Biosynthesis             |                |               |                 |
| Drug Metabolism – Other Enzymes             |                |               |                 |

### Genetic Information Processing

|                                             | Sepsis vs SIRS | SIRS vs Pres. | Sepsis vs Pres. |
|---------------------------------------------|----------------|---------------|-----------------|
| Ribosome                                    | 4              |               |                 |
| Aminoacyl-tRNA Biosynthesis                 |                |               |                 |
| RNA Transport                               |                |               |                 |
| Ribosome Biogenesis in Eukaryotes           |                |               |                 |
| Protein Export                              |                |               |                 |
| Protein Processing in Endoplasmic Reticulum |                |               |                 |
| Ubiquitin Mediated Proteolysis              |                |               |                 |
| Proteasome                                  | 3              |               |                 |
| DNA Replication                             |                |               |                 |
| Homologous Recombination                    |                |               |                 |

### Environmental Information Processing

|                                | Sepsis vs SIRS | SIRS vs Pres. | Sepsis vs Pres. |
|--------------------------------|----------------|---------------|-----------------|
| NOTCH Signaling Pathway        |                |               | 10              |
| HIF-1 Signaling Pathway        |                |               |                 |
| Cell Adhesion Molecules (CAMs) |                |               |                 |

### Cellular Processes

|                | Sepsis vs SIRS | SIRS vs Pres. | Sepsis vs Pres. |
|----------------|----------------|---------------|-----------------|
| Lysosome       | 5              |               |                 |
| Peroxisome     |                |               | 3               |
| Cell Cycle     | 7              |               |                 |
| Oocyte Meiosis |                |               |                 |

### Organismal Systems

|                                              | Sepsis vs SIRS | SIRS vs Pres. | Sepsis vs Pres. |
|----------------------------------------------|----------------|---------------|-----------------|
| Apoptosis – Multiple Species                 |                |               |                 |
| Hematopoietic Cell Lineage                   |                |               |                 |
| TOLL-like Receptor Signaling Pathway         |                |               |                 |
| RIG-I-like Receptor Signaling Pathway        |                |               |                 |
| Antigen Processing and Presentation          |                | 2             | 6               |
| Intestinal Immune Network for IgA Production |                | 6             | 5               |
| Chemokine Signaling Pathway                  |                |               |                 |
| Ovarian Steroidogenesis                      |                |               |                 |
| Vasopressin-Regulated Water Reabsorption     |                |               |                 |
| Osteoclast Differentiation                   |                |               |                 |

### Human Diseases

|                                           | Sepsis vs SIRS | SIRS vs Pres. | Sepsis vs Pres. |
|-------------------------------------------|----------------|---------------|-----------------|
| Viral Carcinogenesis                      |                |               |                 |
| Asthma                                    |                | 9             |                 |
| Systemic Lupus Erythematosus              | 8              |               |                 |
| Rheumatoid Arthritis                      |                | 1             | 2               |
| Autoimmune Thyroid Disease                |                | 8             | 4               |
| Allograft Rejection                       |                | 7             | 7               |
| Graft-versus-Host Disease                 |                | 4             | 1               |
| Alzheimer's Disease                       |                |               | 10              |
| Parkinson's Disease                       | 6              |               | 8               |
| Huntington's Disease                      |                |               |                 |
| Alcoholism                                |                |               |                 |
| Viral Myocarditis                         |                |               |                 |
| Type I Diabetes Mellitus                  |                | 5             | 3               |
| Non-Alcoholic Fatty Liver Disease (NAFLD) |                |               |                 |
| Vibrio Cholerae Infection                 |                |               |                 |
| Pathogenic Escherichia Coli Infection     |                | 2             |                 |
| Staphylococcus Aureus Infection           |                |               |                 |
| Tuberculosis                              |                |               |                 |
| Influenza A                               |                |               |                 |
| Hepatitis C                               |                |               |                 |
| Herpes Simplex Infection                  |                | 3             | 9               |
| Epstein-Barr Virus Infection              |                |               |                 |
| Leishmaniasis                             |                | 10            | 8               |
| African Trypanosomiasis                   |                |               |                 |

Enrichment analysis for KEGG pathways in the microarray data of discovery set CD15<sup>+</sup> cells. False discovery rate (FDR) q-values indicating statistical significance are displayed as green-red heat maps for all three pairwise patient group comparisons. Pathways are grouped by KEGG

PATHWAY database classification (<https://www.genome.jp/kegg/pathway.html>). For each comparison, the top ten pathways in each group, according to the normalized enrichment score (NES), are identified by the NES rank number.

**SUPPLEMENTARY FIGURE 3**

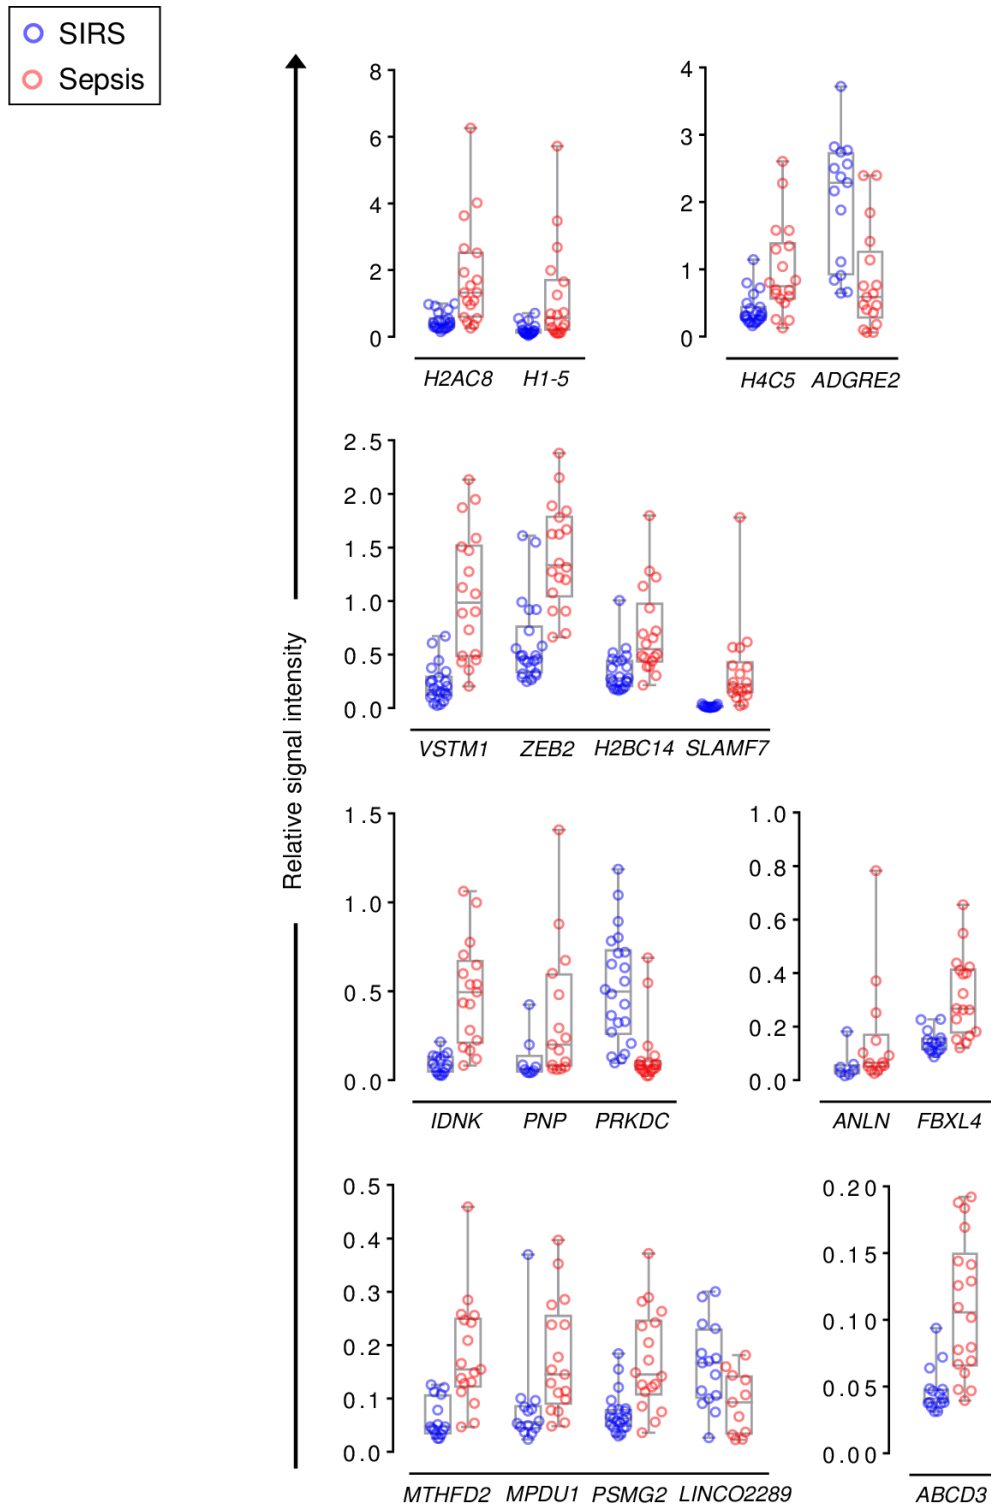

Supplemental QuantiGene Plex validation results for differential expression in sepsis and SIRS peripheral blood CD15<sup>+</sup> cells. Signal intensity distributions for the 18 validated DEGs with cellular localizations and functions other than endo-lysosomal. Group comparisons are arranged by similar intensity ranges.

**SUPPLEMENTARY FIGURE 4**

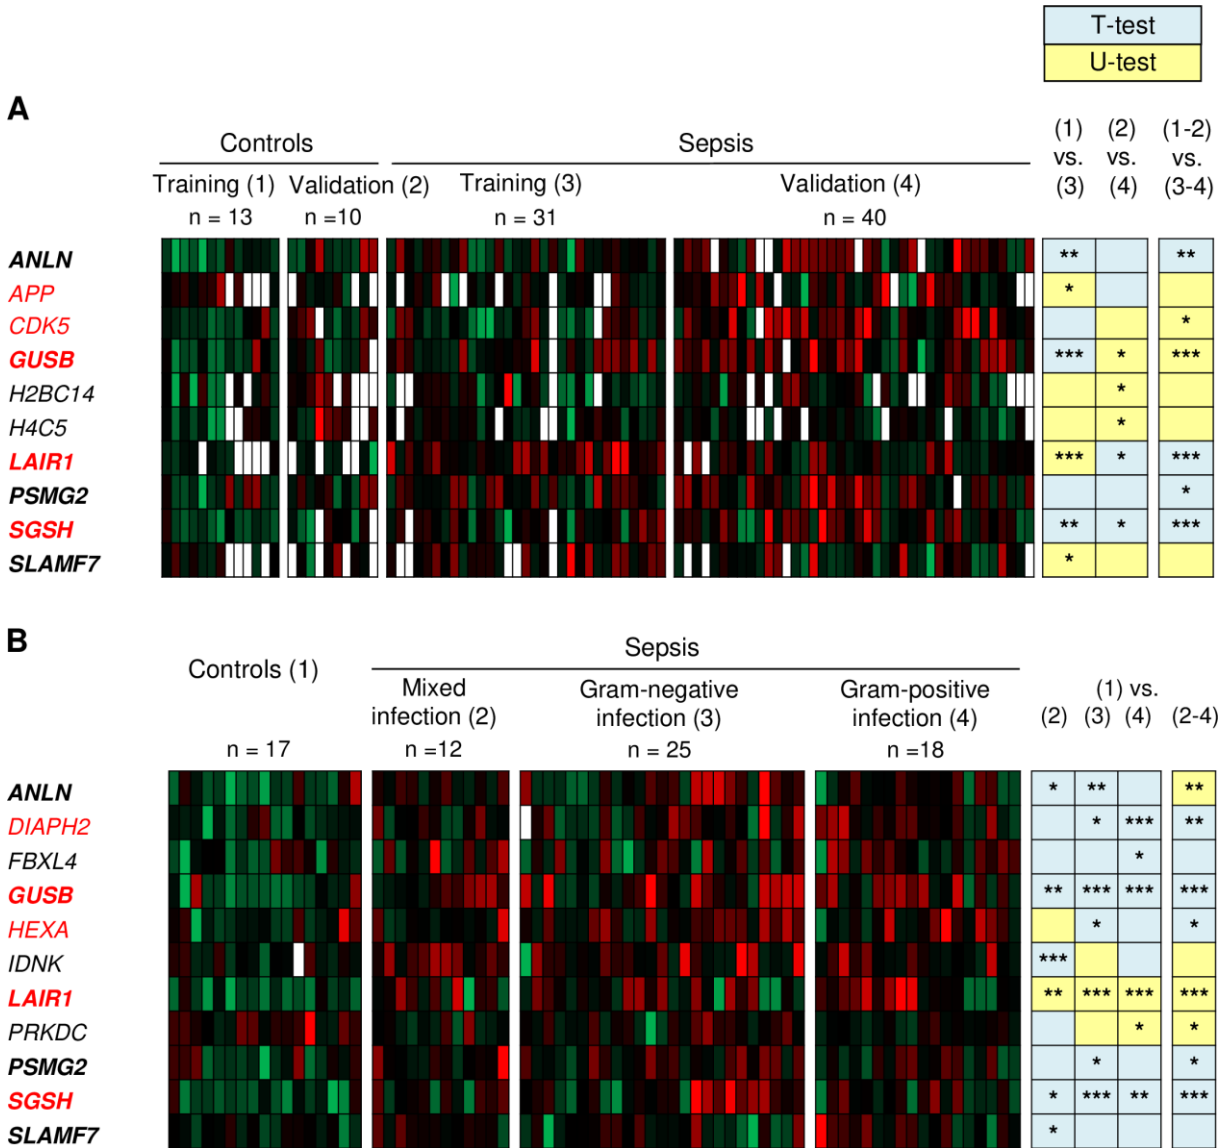

QuantiGene Plex validated genes with differential expression in density-gradient purified neutrophils from patients admitted to the ICU with and without sepsis. Curated microarray data sets were retrieved from GEO Profiles ([www.ncbi.nlm.nih.gov/geo/profiles](http://www.ncbi.nlm.nih.gov/geo/profiles)) (panel **A**: identifier 41143967; panel **B**: identifier 48169967). Tiles are arranged by patient group and genes in alphabetical order. Green indicates minimum and red maximum expression. Considered group comparisons and statistical tests used, as indicated in the main manuscript, are indicated on the right. Gene names of endo-lysosomal genes are printed in red and genes differentially expressed in both data sets (A and B) in bold. \* p<0.05, \*\* p<0.005, \*\*\* p<0.0005.

## SUPPLEMENTARY TABLE 1

QuantiGene Plex Assays (Thermo Fisher Scientific) identified by RefSeq IDs

(<https://www.ncbi.nlm.nih.gov/refseq/>) and validation cohort subset with validated DEGs printed in bold.

| Gene Symbol    | RefSeq ID           | Validation Subset |
|----------------|---------------------|-------------------|
| <b>ABCD3</b>   | <b>NM_001122674</b> | <b>A</b>          |
| <b>ADGRE3</b>  | <b>NM_001289158</b> | <b>B</b>          |
| <i>AKIRIN1</i> | NM_001136275        | B                 |
| <b>ANLN</b>    | <b>NM_001284301</b> | <b>A</b>          |
| <b>APP</b>     | <b>NM_000484</b>    | <b>B</b>          |
| <i>ARFIP1</i>  | NM_001025593        | B                 |
| <i>ASPRV1</i>  | NM_152792           | B                 |
| <i>ATHL1</i>   | NM_025092           | B                 |
| <i>BCL2L15</i> | NM_001010922        | B                 |
| <i>BPI</i>     | NM_001725           | B                 |
| <i>CASS4</i>   | NM_001164114        | B                 |
| <b>CD68</b>    | <b>NM_001040059</b> | <b>A</b>          |
| <i>CDCA7L</i>  | NM_001127370        | B                 |
| <b>CDK5</b>    | <b>NM_001164410</b> | <b>A</b>          |
| <i>CDK5R1</i>  | NM_003885           | B                 |
| <i>CEACAM1</i> | NM_001024912        | B                 |
| <i>CEACAM6</i> | NM_002483           | B                 |
| <i>CHIT1</i>   | NM_001256125        | B                 |
| <i>CLINT1</i>  | NM_001195555        | B                 |
| <i>CNTNAP3</i> | NM_033655           | A                 |
| <b>CTSA</b>    | <b>NM_000308</b>    | <b>B</b>          |
| <i>CYBB</i>    | NM_000397           | B                 |
| <i>CYP51A1</i> | NM_000786           | A                 |
| <i>DHCR7</i>   | NM_001163817        | B                 |
| <i>DHRS9</i>   | NM_001142270        | B                 |
| <b>DIAPH2</b>  | <b>NM_006729</b>    | <b>B</b>          |
| <i>DNM1L</i>   | NM_001278463        | A                 |
| <i>EGR1</i>    | NM_001964           | A                 |
| <i>FBN1</i>    | NM_000138           | A                 |
| <b>FBXL4</b>   | <b>NM_001278716</b> | <b>B</b>          |
| <i>FCHO2</i>   | NM_001146032        | B                 |
| <i>FGL2</i>    | NM_006682           | B                 |
| <b>FIG4</b>    | <b>NM_014845</b>    | <b>B</b>          |
| <i>FLNB</i>    | NM_001164317        | B                 |
| <i>GPI</i>     | NM_000175           | B                 |
| <i>GPR137B</i> | NM_003272           | A                 |
| <i>GPR155</i>  | NM_001033045        | B                 |



**SUPPLEMENTARY TABLE 1 continued**

| <b>GeneSymbol</b>   | <b>RefSeq ID</b>    | <b>Validation Subset</b> |
|---------------------|---------------------|--------------------------|
| <i>GUSB</i>         | <b>NM_000181</b>    | <b>B</b>                 |
| <i>HAL</i>          | NM_001258333        | B                        |
| <i>HCG27</i>        | NR_026791           | B                        |
| <i>HEXA</i>         | <b>NM_000520</b>    | <b>A</b>                 |
| <i>H1-5</i>         | <b>NM_005322</b>    | <b>A</b>                 |
| <i>H1-4</i>         | NM_005321           | B                        |
| <i>H2AC4</i>        | NM_003513           | A                        |
| <i>H2AC8</i>        | <b>NM_021052</b>    | <b>A</b>                 |
| <i>H2BC14</i>       | <b>NM_003521</b>    | <b>A</b>                 |
| <i>H4C5</i>         | <b>NM_003545</b>    | <b>A</b>                 |
| <i>H2BC20P</i>      | NR_036461           | B                        |
| <i>IDNK</i>         | <b>NM_001001551</b> | <b>B</b>                 |
| <i>IKBIP</i>        | NM_153687           | B                        |
| <i>KIF27</i>        | NM_001271927        | A                        |
| <i>LAIR1</i>        | <b>NM_001289023</b> | <b>B</b>                 |
| <i>LCN2</i>         | NM_005564           | B                        |
| <i>LDLR</i>         | <b>NM_000527</b>    | <b>B</b>                 |
| <i>LILRA1</i>       | NM_001278318        | B                        |
| <i>LOC101928143</i> | XR_245781           | B                        |
| <i>LOC101929331</i> | NR_121587           | B                        |
| <i>LINC02289</i>    | <b>NR_110553</b>    | <b>B</b>                 |
| <i>MPHOSPH10P1</i>  | NM_001207030        | B                        |
| <i>LOC728392</i>    | NM_001162371        | B                        |
| <i>LRRC8C</i>       | NM_032270           | B                        |
| <i>LTF</i>          | NM_001199149        | B                        |
| <i>MAK</i>          | NM_001242385        | A                        |
| <i>MARCHF8</i>      | NM_001002265        | B                        |
| <i>MICAL2</i>       | NM_001282663        | B                        |
| <i>MKI67</i>        | NM_001145966        | A                        |
| <i>MPDU1</i>        | <b>NM_00487</b>     | <b>A</b>                 |
| <i>MPO</i>          | NM_000250           | B                        |
| <i>MTHFD2</i>       | <b>NM_001040409</b> | <b>B</b>                 |
| <i>NKG7</i>         | NM_005601           | B                        |
| <i>NLRP1</i>        | NM_001033053        | B                        |
| <i>OLFM4</i>        | NM_006418           | B                        |
| <i>PHOSPHO1</i>     | NM_001143804        | B                        |
| <i>PNP</i>          | <b>NM_000270</b>    | <b>A</b>                 |
| <i>PRAMEF9</i>      | NM_001010890        | B                        |
| <i>PRKDC</i>        | <b>NM_001081640</b> | <b>A</b>                 |
| <i>PRTN3</i>        | NM_002777           | B                        |
| <i>PSMG2</i>        | <b>NM_020232</b>    | <b>A</b>                 |

**SUPPLEMENTARY TABLE 1 continued**

| <b>GeneSymbol</b>    | <b>RefSeq ID</b>    | <b>Validation Subset</b> |
|----------------------|---------------------|--------------------------|
| <i>REM2</i>          | NM_173527           | B                        |
| <i>RETN</i>          | NM_001193374        | B                        |
| <b><i>RNASE2</i></b> | <b>NM_002934</b>    | <b>A</b>                 |
| <i>RPL13P5</i>       | NR_002803           | B                        |
| <i>RRM2</i>          | NM_001034           | A                        |
| <i>SCPEP1</i>        | NM_021626           | B                        |
| <i>SGMS1</i>         | NM_147156           | B                        |
| <b><i>SGSH</i></b>   | <b>NM_000199</b>    | <b>B</b>                 |
| <b><i>SLAMF7</i></b> | <b>NM_001282588</b> | <b>A</b>                 |
| <i>SMPDL3A</i>       | NM_001286138        | B                        |
| <i>SNORA2B</i>       | NR_002951           | A                        |
| <i>SNORD85</i>       | NR_003066           | A                        |
| <i>SNORD94</i>       | NR_004378           | B                        |
| <i>SREBF2</i>        | NM_004599           | A                        |
| <i>STOM</i>          | NM_001270526        | B                        |
| <i>SUSD3</i>         | NM_001287005        | B                        |
| <i>TARS</i>          | NM_001258437        | A                        |
| <i>TCN1</i>          | NM_001062           | B                        |
| <i>TCTEX1D1</i>      | NM_152665           | B                        |
| <i>TMCC3</i>         | NM_001301036        | A                        |
| <i>TOP2A</i>         | NM_001067           | A                        |
| <b><i>TPP1</i></b>   | <b>NM_000391</b>    | <b>A</b>                 |
| <i>TSPAN31</i>       | NM_005981           | B                        |
| <b><i>VSTM1</i></b>  | <b>NM_001288791</b> | <b>A</b>                 |
| <i>XYLT1</i>         | NM_022166           | B                        |
| <b><i>ZEB2</i></b>   | <b>NM_001171653</b> | <b>A</b>                 |
| <i>ZNF33A</i>        | NM_001278170        | B                        |

## SUPPLEMENTARY TABLE 2

Specifications for fluorochrome-conjugated monoclonal antibodies (BD Biosciences) used in flow cytometry

| <b>Antigen</b> | <b>Clone</b> | <b>Fluorochrome</b> |
|----------------|--------------|---------------------|
| CD11b          | ICRF44       | FITC                |
| CD14           | M $\phi$ P9  | BV510               |
| CD15           | H198         | APC                 |
| CD16           | 3G8          | APC-Cy7             |
| CD33           | WM53         | BV421               |
| CD34           | 8G12         | PE-Cy7              |
| CD45           | 2D1          | PerCP               |
| CD49d          | L25          | PE                  |

### SUPPLEMENTARY TABLE 3

Summary of QuantiGene Plex validation results

| Gene Symbol      | Bonferroni-Adjusted <i>P</i> -Value               |           |          |             | Median Fold Diff. Sepsis/SIRS | Protein Association <sup>b</sup> |    |    |    |
|------------------|---------------------------------------------------|-----------|----------|-------------|-------------------------------|----------------------------------|----|----|----|
|                  | Selection Strategy (Validation <sup>a</sup> Rate) |           |          |             |                               | AG                               | SG | FG | CM |
|                  | 1 (11/54)                                         | 2 (23/54) | 3 (7/13) | 1-3 (26/93) |                               |                                  |    |    |    |
| <i>ABCD3</i>     |                                                   | <0.0001   |          | <0.0001     | 2.6                           |                                  |    |    |    |
| <i>CTSA</i>      | <0.0001                                           |           | <0.0001  | <0.0001     | 2.9                           | X                                |    |    |    |
| <i>DIAPH2</i>    | <0.0001                                           |           |          | <0.0001     | 2.8                           |                                  |    |    |    |
| <i>SLAMF7</i>    |                                                   | <0.0001   |          | <0.0001     | 19.0                          |                                  |    |    |    |
| <i>VSTM1</i>     |                                                   | <0.0001   |          | <0.0001     | 5.6                           |                                  |    |    | X  |
| <i>ZEB2</i>      |                                                   | <0.0001   |          | 0.0001      | 2.8                           |                                  |    |    |    |
| <i>PRKDC</i>     |                                                   | 0.0001    |          | 0.0002      | 0.2                           |                                  |    |    |    |
| <i>SGSH</i>      | 0.0001                                            |           | <0.0001  | 0.0002      | 4.6                           |                                  |    |    |    |
| <i>IDNK</i>      | 0.0002                                            |           |          | 0.0003      | 5.8                           |                                  |    |    |    |
| <i>MTHFD2</i>    |                                                   | 0.0004    |          | 0.0009      | 3.3                           |                                  |    |    |    |
| <i>H2AC8</i>     |                                                   | 0.0007    |          | 0.0015      | 3.6                           |                                  |    |    |    |
| <i>CDK5</i>      |                                                   | 0.0010    |          | 0.0022      | 3.1                           |                                  |    |    |    |
| <i>FBXL4</i>     | 0.0021                                            | 0.0017    |          | 0.0037      | 1.9                           |                                  |    |    |    |
| <i>TPP1</i>      |                                                   | 0.0018    | 0.0006   | 0.0037      | 2.6                           |                                  |    | X  |    |
| <i>PSMG2</i>     |                                                   | 0.0024    |          | 0.0050      | 2.3                           |                                  |    |    |    |
| <i>MPDU1</i>     | 0.0031                                            | 0.0026    |          | 0.0054      | 2.6                           |                                  |    |    |    |
| <i>CD68</i>      |                                                   | 0.0036    |          | 0.0076      | 2.3                           |                                  |    |    |    |
| <i>LAIR1</i>     | 0.0050                                            |           |          | 0.0085      | 7.4                           |                                  | X  |    |    |
| <i>HEXA</i>      |                                                   | 0.0041    | 0.0013   | 0.0087      | 2.4                           | X                                |    |    |    |
| <i>H2BC14</i>    |                                                   | 0.0070    |          | 0.0149      | 2.0                           |                                  |    |    |    |
| <i>GUSB</i>      | 0.0108                                            | 0.0088    | 0.0028   | 0.0187      | 2.3                           | X                                |    |    |    |
| <i>APP</i>       | 0.0130                                            |           |          | 0.0225      | 3.6                           | X                                |    |    |    |
| <i>FIG4</i>      | 0.0130                                            | 0.0106    |          | 0.0225      | 2.7                           |                                  |    |    |    |
| <i>PNP</i>       |                                                   | 0.0115    |          | 0.0243      | 3.4                           |                                  |    | X  |    |
| <i>ADGRE3</i>    | 0.0187                                            |           |          | 0.0323      | 0.3                           |                                  |    |    |    |
| <i>H1-5</i>      |                                                   | 0.0191    |          | 0.0404      | 4.6                           |                                  |    |    |    |
| <i>LINC02289</i> |                                                   | 0.0240    |          | 0.0508      | 0.6                           |                                  |    |    |    |
| <i>ANLN</i>      |                                                   | 0.0271    |          | 0.0573      | 1.8                           |                                  |    |    |    |
| <i>H4C5</i>      |                                                   | 0.0382    |          | 0.0808      | 2.7                           |                                  |    |    |    |
| <i>RNASE2</i>    |                                                   | 0.0476    | 0.0152   | 0.1007      | 3.7                           | X                                |    |    |    |
| <i>LDLR</i>      | 0.1000                                            |           | 0.0259   | 0.1722      | 1.8                           |                                  |    |    |    |

<sup>a</sup> Validation of a DEG was given if statistical significance was reached within any selection strategy.

<sup>b</sup> Protein associations according to Grassi *et al.* (Cell Rep 2018; 24: 2784-2794).

AG: Azurophilic Granules. SG: Secondary or Specific Granules. FG: Ficolin-Containing Granules. CM: Cell Membrane

The color scale corresponds to the p-values shown with white set to a p-value of 0.05 and increasing depth of blue and red, respectively, decreasing and increasing p-values.

**SUPPLEMENTARY TABLE 3 continued**

| <b>Gene Symbol</b>       | <b>Bonferroni-Adjusted P-Value</b> |          |          |            |
|--------------------------|------------------------------------|----------|----------|------------|
|                          | <b>Selection Strategy</b>          |          |          |            |
|                          | <b>1</b>                           | <b>2</b> | <b>3</b> | <b>1-3</b> |
| <i>SUSD3</i>             |                                    | 0.0580   |          | 0.1225     |
| <i>LRRC8C</i>            |                                    | 0.0615   |          | 0.1300     |
| <i>FLNB</i>              |                                    | 0.0637   |          | 0.1346     |
| <i>CLINT1</i>            | 0.0818                             |          |          | 0.1409     |
| <i>H1-4</i>              |                                    | 0.0898   |          | 0.1897     |
| <i>BPI</i>               | 0.2535                             |          |          | 0.4366     |
| <i>SMPDL3A</i>           | 0.2573                             |          | 0.0667   | 0.4431     |
| <i>IKBIP</i>             | 0.2889                             |          |          | 0.4976     |
| <i>SNORD94</i>           | 0.3286                             |          |          | 0.5660     |
| <i>TMCC3</i>             |                                    | 0.3367   |          | 0.7116     |
| <i>CYBB</i>              | 0.4224                             |          |          | 0.7275     |
| <i>PRTN3</i>             |                                    |          | 0.1429   | 0.9495     |
| <i>ARFIP1</i>            | 1.0000                             |          |          | 1.0000     |
| <i>ASPRV1</i>            | 1.0000                             |          |          | 1.0000     |
| <i>ATHL1</i>             | 1.0000                             |          |          | 1.0000     |
| <i>CASS4</i>             | 1.0000                             |          |          | 1.0000     |
| <i>CDCA7L</i>            |                                    | 1.0000   |          | 1.0000     |
| <i>CDK5R1</i>            | 1.0000                             |          |          | 1.0000     |
| <i>CEACAM1</i>           | 1.0000                             |          |          | 1.0000     |
| <i>CEACAM6</i>           |                                    | 1.0000   |          | 1.0000     |
| <i>CHIT1</i>             |                                    |          | 0.6800   | 1.0000     |
| <i>CNTNAP3</i>           |                                    | 1.0000   |          | 1.0000     |
| <i>CYP51A1</i>           |                                    | 1.0000   |          | 1.0000     |
| <i>DHCR7</i>             | 1.0000                             |          |          | 1.0000     |
| <i>DHRS9</i>             |                                    | 1.0000   |          | 1.0000     |
| <i>EGR1</i>              |                                    | 1.0000   |          | 1.0000     |
| <i>FBN1</i>              |                                    | 1.0000   |          | 1.0000     |
| <i>FCHO2<sup>a</sup></i> | 1.0000                             |          |          | 1.0000     |
| <i>FGL2</i>              | 1.0000                             |          |          | 1.0000     |
| <i>GPI</i>               | 1.0000                             |          |          | 1.0000     |
| <i>GPR137B</i>           |                                    | 1.0000   | 0.8158   | 1.0000     |
| <i>GPR155</i>            | 1.0000                             |          |          | 1.0000     |
| <i>HAL</i>               | 1.0000                             |          |          | 1.0000     |
| <i>HCG27</i>             | 1.0000                             |          |          | 1.0000     |
| <i>H2BC20P</i>           | 1.0000                             |          |          | 1.0000     |
| <i>KIF27</i>             |                                    | 1.0000   |          | 1.0000     |

**SUPPLEMENTARY TABLE 3 continued**

| <b>Gene Symbol</b>  | <b>Bonferroni-Adjusted <i>P</i>-Value</b> |          |          |            |
|---------------------|-------------------------------------------|----------|----------|------------|
|                     | <b>Selection Strategy</b>                 |          |          |            |
|                     | <b>1</b>                                  | <b>2</b> | <b>3</b> | <b>1-3</b> |
| <i>LCN2</i>         | 1.0000                                    |          |          | 1.0000     |
| <i>LILRA1</i>       | 1.0000                                    |          |          | 1.0000     |
| <i>LOC101928143</i> | 1.0000                                    | 1.0000   |          | 1.0000     |
| <i>LOC101929331</i> | 1.0000                                    |          |          | 1.0000     |
| <i>MPHOSPH10P1</i>  | 1.0000                                    |          |          | 1.0000     |
| <i>LOC728392</i>    | 1.0000                                    |          |          | 1.0000     |
| <i>LTF</i>          | 0.7637                                    |          |          | 1.0000     |
| <i>MAK</i>          | 1.0000                                    | 1.0000   |          | 1.0000     |
| <i>MARCHF8</i>      | 1.0000                                    |          | 1.0000   | 1.0000     |
| <i>MICAL2</i>       | 1.0000                                    |          |          | 1.0000     |
| <i>MPO</i>          |                                           |          | 0.2584   | 1.0000     |
| <i>NKG7</i>         | 0.7637                                    |          |          | 1.0000     |
| <i>NLRP1</i>        | 1.0000                                    |          |          | 1.0000     |
| <i>OLFM4</i>        | 1.0000                                    |          |          | 1.0000     |
| <i>PHOSPHO1</i>     | 1.0000                                    |          |          | 1.0000     |
| <i>REM2</i>         | 1.0000                                    |          |          | 1.0000     |
| <i>RETN</i>         | 1.0000                                    |          |          | 1.0000     |
| <i>RPL13P5</i>      | 1.0000                                    | 1.0000   |          | 1.0000     |
| <i>SCPEP1</i>       |                                           |          | 0.5112   | 1.0000     |
| <i>SGMS1</i>        | 1.0000                                    | 1.0000   |          | 1.0000     |
| <i>STOM</i>         | 1.0000                                    |          |          | 1.0000     |
| <i>TCN1</i>         | 0.9549                                    |          |          | 1.0000     |
| <i>TCTEX1D1</i>     |                                           | 1.0000   |          | 1.0000     |
| <i>TSPAN31</i>      |                                           | 1.0000   |          | 1.0000     |
| <i>XYLT1</i>        | 1.0000                                    |          |          | 1.0000     |
| <i>ZNF33A</i>       | 1.0000                                    | 1.0000   |          | 1.0000     |
| <i>BCL2L15</i>      |                                           | negative |          |            |
| <i>DNM1L</i>        |                                           | negative |          |            |
| <i>H2AC4</i>        |                                           | negative |          |            |
| <i>MKI67</i>        |                                           | negative |          |            |
| <i>PRAMEF9</i>      | negative                                  |          |          |            |
| <i>RRM2</i>         |                                           | negative |          |            |
| <i>SNORA2B</i>      |                                           | negative |          |            |
| <i>SNORD85</i>      |                                           | negative |          |            |
| <i>SREBF2</i>       |                                           | negative |          |            |

**SUPPLEMENTARY TABLE 3 continued**

| <b>Gene Symbol</b> | <b>Bonferroni-Adjusted <i>P</i>-Value</b> |          |          |            |
|--------------------|-------------------------------------------|----------|----------|------------|
|                    | <b>Selection Strategy</b>                 |          |          |            |
|                    | <b>1</b>                                  | <b>2</b> | <b>3</b> | <b>1-3</b> |
| <i>TARS</i>        |                                           | negative |          |            |
| <i>TOP2A</i>       |                                           | negative |          |            |

Negative: Signal intensities were above background for less than four patients in the sepsis and/or SIRS group.



**SUPPLEMENTARY TABLE 4** ICU patient clinical characteristics for the extended recruitment period (2018–2020) of the validation cohort.

|                                         | Sepsis (n = 10) | SIRS (n = 10) |
|-----------------------------------------|-----------------|---------------|
| <b>Demographics</b>                     |                 |               |
| Age mean (sd) (years)                   | 64.7 (14.5)     | 66.4 (12.7)   |
| Male/Female                             | 7/3             | 8/2           |
| <b>Infections, n (%)<sup>1</sup></b>    |                 |               |
| Gram-negative bacteria                  | 2 (20)          |               |
| Gram-positive bacteria                  | 1 (10)          |               |
| Fungal                                  | 1 (10)          |               |
| Viral                                   | 0 (0)           |               |
| <b>Treatments, n (%)</b>                |                 |               |
| Anti-infective <sup>2</sup>             | 9 (90)          | 0 (0) ***     |
| Mechanical ventilation                  | 10 (100)        | 2 (20) ***    |
| Renal replacement therapy               | 0 (0)           | 0 (0)         |
| Catecholamines <sup>3</sup>             | 9 (90)          | 3 (30) *      |
| <b>Comorbidities, n (%)<sup>4</sup></b> |                 |               |
| Renal disease                           | 0 (0)           | 1 (10)        |
| Peripheral vascular disease             | 1 (10)          | 3 (30)        |
| Congestive heart failure                | 3 (30)          | 1 (10)        |
| Any malignancy <sup>5</sup>             | 1 (10)          | 3 (30)        |
| Metastatic solid tumor                  | 0 (0)           | 0 (0)         |
| Plegia <sup>6</sup>                     | 1 (10)          | 0 (0)         |
| Diabetes with chronic complications     | 1 (10)          | 0 (0)         |

**SUPPLEMENTARY TABLE 4 continued**

|                                                      | Sepsis (n = 10) | SIRS (n = 10) |
|------------------------------------------------------|-----------------|---------------|
| Diabetes without chronic complications               | 7 (70)          | 0 (0)**       |
| Mild liver disease                                   | 1 (10)          | 0 (0)         |
| Dementia                                             | 0 (0)           | 0 (0)         |
| Chronic pulmonary disease                            | 1 (10)          | 1 (10)        |
| Myocardial infarction                                | 2 (20)          | 0 (0)         |
| Cerebrovascular disease                              | 0 (0)           | 0 (0)         |
| <b>Hospital mortality, n (%)</b>                     | 4 (40)          | 1 (10)        |
| <b>SOFA score (sd)<sup>7,8</sup></b>                 | 9.2 (2.7)       | 5.0 (3.0)*    |
| <b>Blood parameters, mean (sd)</b>                   |                 |               |
| CRP (mg/L)                                           | 184.5 (78.0)    | 83.0 (56.9)** |
| Lactate (mmol/L) <sup>8,9</sup>                      | 2.46 (1.20)     | 1.93 (1.41)   |
| Sodium (mmol/L) <sup>10</sup>                        | 142.4 (3.7)     | 137.6 (1.7)** |
| Total bilirubin (mg/dL)                              | 1.06 (0.76)     | 1.02 (0.74)   |
| Creatinine (mg/dL)                                   | 1.68 (0.82)     | 1.58 ± 0.82   |
| Platelets (10 <sup>9</sup> /L)                       | 239.9 (175.3)   | 196.4 (92.1)  |
| White blood cells (10 <sup>9</sup> /L) <sup>11</sup> | 11.79 (4.07)    | 16.67 (10.65) |

sd = standard deviation

<sup>1</sup>Microbiology laboratory-confirmed infections.

<sup>2</sup>This term indicates antibacterial, antimycotic, or antiviral drugs or combined treatment.

<sup>3</sup>This term denotes adrenalin, noradrenalin, dobutamine or combined treatment.

<sup>4</sup>In accordance with the charted Charlson Comorbidity Index

<sup>5</sup>This term includes leukemia and lymphoma.

<sup>6</sup>Hemiplegia or paraplegia.

<sup>7</sup>SOFA score, CRP and lactate levels were determined on ICU admission.

<sup>8</sup>For four SIRS patients, complete data to derive the SOFA score were not available.

<sup>9</sup>For four SIRS patients, lactate determinations were not available.

<sup>10</sup>For two SIRS patients, sodium determinations were not available.

<sup>11</sup>For one sepsis patient, white blood cell counts were not available.

\*\*\*  $P < 0.001$ , \*\*  $P < 0.01$ , \*  $P < 0.05$  after Mann-Whitney U test or Fisher's exact test for sepsis vs. SIRS.
